# Supplementary material for: Dinosaur morphological diversity and the end-Cretaceous extinction
Source: Springer Nature journal article supplement (doi:10.1038/ncomms1815), 2012-05-01
Supplement: 41467_2012_BFncomms1815_MOESM755_ESM.pdf [file 41467_2012_BFncomms1815_MOESM755_ESM.pdf]

Supplementary Information For:

**Dinosaur morphological diversity and the end Cretaceous extinction**

Stephen L. Brusatte, Richard J. Butler, Albert Prieto-Márquez, Mark A. Norell

- Supplementary Figures S1-S3
- Supplementary Tables S1-S2
- Supplementary Methods
- Supplementary References

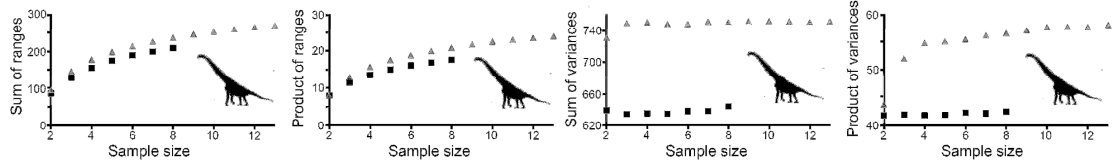

**Supplementary Figure S1. Rarefaction plots showing how global Campanian-Maastrichtian sauropod disparity comparisons (Fig. 1) are affected by uneven sample size.** Each plot shows the disparity value of Maastrichtian (triangles) and Campanian (square) sauropods calculated at ever smaller subsampled sample sizes, which permits comparison of disparity between groups at equal sample sizes for both time bins. Note that the general disparity increase from the Campanian to the Maastrichtian for sauropods is recovered at all sample sizes down to a common size of two.

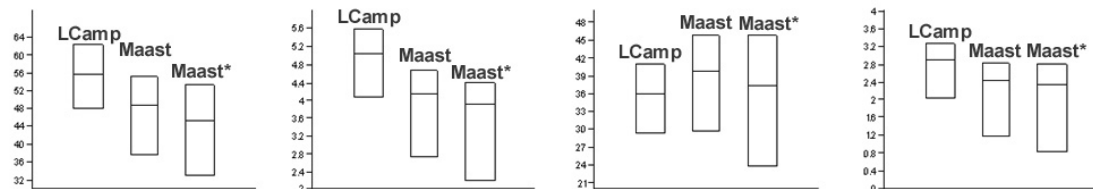

**Supplementary Figure S2. Four disparity metrics compared in late Campanian and Maastrichtian pachycephalosaurs, both including and excluding the controversial *Dracorex* (which may be a separate taxon or a juvenile of *Pachycephalosaurus*).** From left to right, the plots depict sum of ranges, product of ranges, sum of variances, and product of variances. “LCamp” refers to the disparity of late Campanian taxa, “Maast” to the disparity of Maastrichtian taxa, and “Maast\*” to the disparity of Maastrichtian taxa minus *Dracorex*. The boxes represent the extent of 95% error bars and the horizontal line inside the box is the disparity measure for the group in question. The overlap or non-overlap of the error bars denotes statistical significance. In this case, none of the comparisons are significantly different. Late Campanian and Maastrichtian disparity are indistinguishable from each other (regardless of whether *Dracorex* is included in the Maastrichtian calculations), and the alternate Maastrichtian calculations (with and without *Dracorex*) are statistically indistinguishable.

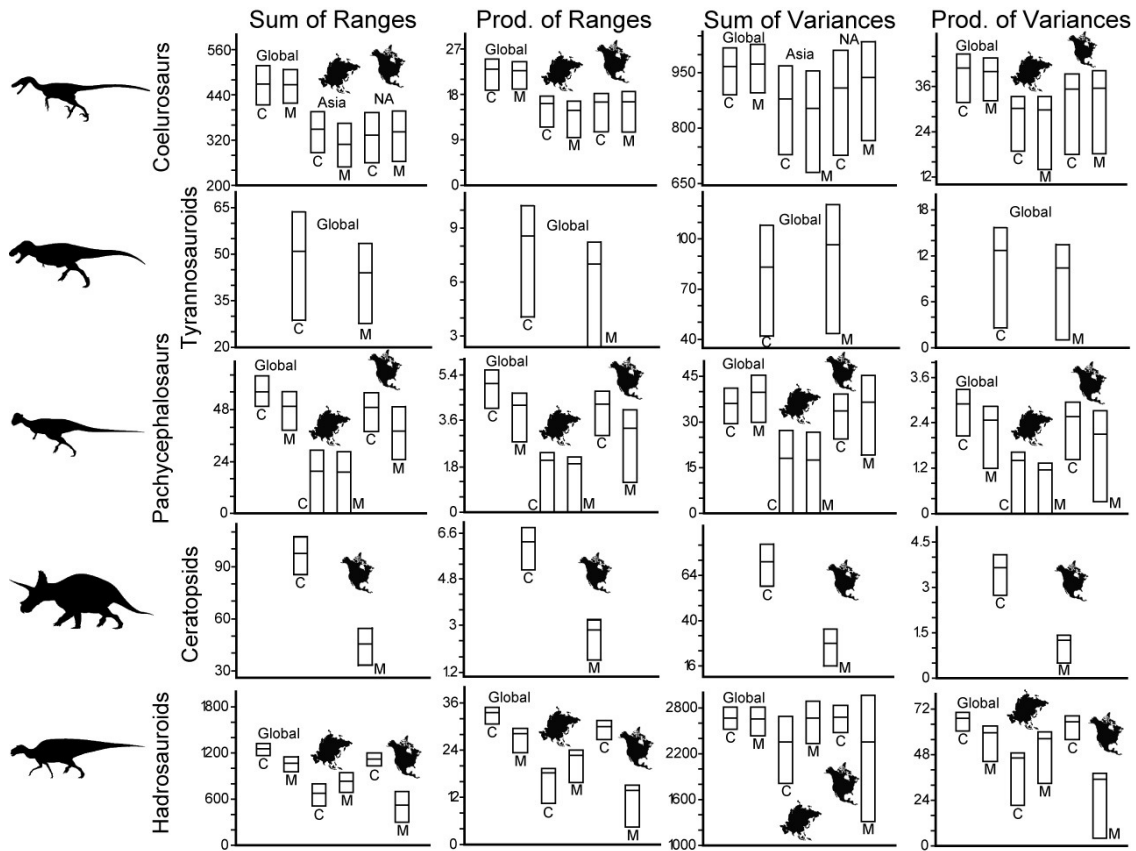

**Supplementary Figure S3. Results of supplementary disparity analysis, showing Campanian and Maastrichtian disparity trends in five dinosaur clades on both global and regional scales.** Disparity is based on four metrics (sum of ranges, product of ranges, sum of variances, product of variances on principal component axes representing overall morphology). Each plot contains either one or three sets of comparisons between late Campanian (C) and Maastrichtian (M) disparity values. For tyrannosauroids only global disparity measures are presented and for ceratopsids only North American disparity measures are presented, but for coelurosaur, pachycephalosaur, and hadrosauroid the disparity of global, Asian, and North American taxon sets are shown. Boxes represent 95% error bars, with horizontal line within the box representing the disparity measure. Statistical significance of disparity comparisons is indicated by the non-overlap of error bars. Sauropods and ankylosaurs are not shown here because their Campanian-Maastrichtian comparisons are reported in Figure 1 in the main text (see discussion above for why this is the case). Silhouettes courtesy of Scott Hartman (<http://www.skeletaldrawing.com/>).

**Supplementary Table S1.** Temporal, locality, and geographic data for the taxa analyzed here.

| Taxon                               | Time Bin                 | Formation <sup>1</sup>                                                        | Continent <sup>2</sup> |
|-------------------------------------|--------------------------|-------------------------------------------------------------------------------|------------------------|
| <b>Coelurosaurs</b>                 |                          |                                                                               |                        |
| <i>Oviraptor philoceratops</i>      | LCampanian               | Djadokhta Fm.                                                                 | Asia                   |
| <i>Conchoraptor gracilis</i>        | LCampanian               | Nemegt Fm. <sup>3</sup>                                                       | Asia                   |
| <i>Mahakala omnogovae</i>           | LCampanian               | Djadokhta Fm.                                                                 | Asia                   |
| <i>Citipati osmolskae</i>           | LCampanian               | Djadokhta Fm.                                                                 | Asia                   |
| <i>Velociraptor mongoliensis</i>    | LCampanian               | Djadokhta Fm.                                                                 | Asia                   |
| <i>Tsaagan mangas</i>               | LCampanian               | Djadokhta Fm.                                                                 | Asia                   |
| <i>Shuvuuia deserti</i>             | LCampanian               | Djadokhta Fm.                                                                 | Asia                   |
| <i>Saurornithoides mongoliensis</i> | LCampanian               | Djadokhta Fm.                                                                 | Asia                   |
| <i>Byronosaurus jaffei</i>          | LCampanian               | Djadokhta Fm.                                                                 | Asia                   |
| <i>Daspletosaurus torosus</i>       | LCampanian               | Oldman Fm.<br>Horseshoe Can. Fm.                                              | NA (1)                 |
| <i>Rinchenia mongoliensis</i>       | Maastrichtian            | Nemegt Fm.                                                                    | Asia                   |
| <i>Adasaurus mongoliensis</i>       | Maastrichtian            | Nemegt Fm.                                                                    | Asia                   |
| <i>Rahonavis ostromi</i>            | Maastrichtian            | Maevarano Fm.                                                                 | Madagascar             |
| <i>Tyrannosaurus rex</i>            | Maastrichtian            | Hell Creek Fm.                                                                | NA (3)                 |
| <i>Anserimimus laninchus</i>        | Maastrichtian            | Nemegt Fm.                                                                    | Asia                   |
| <i>Balaur bondoc</i>                | Maastrichtian            | Sebes Fm.                                                                     | Europe                 |
| <i>Ingenia yanshini</i>             | Maastrichtian            | Nemegt Fm.                                                                    | Asia                   |
| <i>Mononykus olecranus</i>          | Maastrichtian            | Nemegt Fm.                                                                    | Asia                   |
| <i>Gallimimus bullatus</i>          | Maastrichtian            | Nemegt Fm.                                                                    | Asia                   |
| <i>Zanabazar junior</i>             | Maastrichtian            | Nemegt Fm.                                                                    | Asia                   |
| <i>Chirostenotes elegans</i>        | LCamp-Maast              | Dinosaur Park Fm.<br>Hell Creek Fm.<br>Two Medicine Fm.<br>Horseshoe Can. Fm. | NA (1-3)               |
| <i>Dromaeosaurus albertensis</i>    | LCamp-Maast              | Dinosaur Park Fm.<br>Judith River Fm.<br>Scollard Fm.                         | NA (1-3)               |
| <i>Saurornitholestes langstoni</i>  | LCamp-Maast              | Dinosaur Park Fm.<br>Oldman Fm.<br>Judith River Fm.<br>Scollard Fm.           | NA (1-3)               |
| <i>Struthiomimus altus</i>          | LCamp-Maast              | Dinosaur Park Fm.<br>Horseshoe Can. Fm.                                       | NA (1,2)               |
| <i>Troodon formosus</i>             | LCamp-Maast              | Dinosaur Park Fm.<br>Hell Creek Fm.<br>Judith River Fm.<br>Two Medicine Fm.   | NA (1-3)               |
| <i>Albertosaurus sarcophagus</i>    | LCamp-Maast <sup>4</sup> | Dinosaur Park Fm.<br>Horseshoe Can. Fm.                                       | NA (2,3)               |
| <i>Ornithomimus edmontonicus</i>    | LCamp-Maast              | Dinosaur Park Fm.                                                             | NA (1-3)               |

|                                         |                          |                                                                  |          |
|-----------------------------------------|--------------------------|------------------------------------------------------------------|----------|
| <i>Avimimus portentosus</i>             | LCamp-Maast              | Lance Fm.<br>Horseshoe Can. Fm.<br>Djadokhta Fm.?<br>Nemegt Fm.? | Asia     |
| <b>Tyrannosauroids</b>                  |                          |                                                                  |          |
| <i>Appalachiosaurus montgomeriensis</i> | Campanian                | Demopolis Chalk                                                  | NA (1)   |
| <i>Bistahieversor sealeyi</i>           | Campanian                | Kirtland Fm.                                                     | NA (1)   |
| <i>Teratophoneus curriei</i>            | Campanian                | Kaiparowits Fm.                                                  | NA (1)   |
| <i>Gorgosaurus libratus</i>             | Campanian                | Dinosaur Park Fm.                                                | NA (1)   |
| <i>Daspletosaurus torosus</i>           | LCampanian               | Dinosaur Park Fm.<br>Oldman Fm.                                  | NA (1)   |
| <i>Dryptosaurus aquilunguis</i>         | Maastrichtian            | New Egypt Fm.                                                    | NA (3)   |
| <i>Alioramus altai</i>                  | Maastrichtian            | Nemegt Fm.                                                       | Asia     |
| <i>Tarbosaurus bataar</i>               | Maastrichtian            | Nemegt Fm.                                                       | Asia     |
| <i>Tyrannosaurus rex</i>                | Maastrichtian            | Hell Creek Fm.                                                   | NA (3)   |
| <i>Albertosaurus sarcophagus</i>        | LCamp-Maast <sup>4</sup> | Dinosaur Park Fm.<br>Horseshoe Can. Fm.                          | NA (2,3) |
| <b>Pachycephalosaurs</b>                |                          |                                                                  |          |
| <i>Stegoceras validum</i>               | LCampanian               | Dinosaur Park Fm.                                                | NA (1)   |
| <i>Gravitholus albertae</i>             | LCampanian               | Oldman Fm.                                                       | NA (1)   |
| <i>Colepiocephale lambei</i>            | LCampanian               | Foremost Fm.                                                     | NA       |
| <i>Texacephale langstoni</i>            | LCampanian               | Aguja Fm.                                                        | NA (2)   |
| <i>Hanssuesia sternbergi</i>            | LCampanian               | Dinosaur Park Fm.                                                | NA (1)   |
| <i>Sphaerotherolus brevis</i>           | LCampanian               | Dinosaur Park Fm.                                                | NA (1)   |
| <i>Sphaerotherolus goodwini</i>         | LCampanian               | Kirtland Fm.                                                     | NA (1)   |
| <i>Alaskacephale gangloffii</i>         | LCampanian               | Prince Creek Fm.                                                 | NA (2)   |
| <i>Sphaerotherolus edmontonensis</i>    | Maastrichtian            | Horseshoe Can. Fm.                                               | NA (2)   |
| <i>Sphaerotherolus bucholtzae</i>       | Maastrichtian            | Hell Creek Fm.                                                   | NA (3)   |
| <i>Stygimoloch spinifer</i>             | Maastrichtian            | Hell Creek Fm.                                                   | NA (3)   |
| <i>Dracorex hogwartsi</i>               | Maastrichtian            | Hell Creek Fm.                                                   | NA (3)   |
| <i>Pachycephalosaurus wyomingensis</i>  | Maastrichtian            | Hell Creek Fm.                                                   | NA (3)   |
| <i>Tylocephale gilmorei</i>             | LCampanian               | Barun Goyot Fm.                                                  | Asia     |
| <i>Prenocephale prenes</i>              | Maastrichtian            | Nemegt Fm.                                                       | Asia     |
| <i>Homalocephale calathocercos</i>      | Maastrichtian            | Nemegt Formation                                                 | Asia     |
| <i>Goyocephale lattimorei</i>           | LCampanian               | Unnamed unit                                                     | Asia     |
| <i>Wannanosaurus yansiensis</i>         | LCamp-Maast              | Xiaoyan Formation                                                | Asia     |
| <b>Ceratopsids</b>                      |                          |                                                                  |          |
| <i>Albertaceratops nesmoi</i>           | LCampanian               | Oldman Fm.                                                       | NA (1)   |
| <i>Centrosaurus apertus</i>             | LCampanian               | Dinosaur Park Fm.                                                | NA (1)   |
| <i>Pachyrhinosaurus lakustai</i>        | LCampanian               | Wapiti Fm.                                                       | NA (2)   |
| <i>Chasmosaurus russelli</i>            | LCampanian               | Dinosaur Park Fm.                                                | NA (1)   |
| <i>Chasmosaurus belli</i>               | LCampanian               | Dinosaur Park Fm.                                                | NA (1)   |

|                                      |               |                      |        |
|--------------------------------------|---------------|----------------------|--------|
| <i>Mojoceratops perifania</i>        | LCampanian    | Dinosaur Park Fm.    | NA (1) |
| <i>Agujaceratops mariscalensis</i>   | LCampanian    | Aguja Fm.            | NA (2) |
| <i>Utahceratops gettyi</i>           | LCampanian    | Kaiparowits Fm.      | NA (1) |
| <i>Pentaceratops sternbergii</i>     | LCampanian    | Fruitland Fm.        | NA (1) |
|                                      |               | Kirtland Fm.         |        |
| <i>Coahuilaceratops magnacuerna</i>  | LCampanian    | Cerro del Pueblo Fm. | NA (2) |
| <i>Kosmoceratops richardsoni</i>     | LCampanian    | Kaiparowits Fm.      | NA (1) |
| <i>Vagaceratops irvinensis</i>       | LCampanian    | Dinosaur Park Fm.    | NA (1) |
| <i>Anchiceratops ornatus</i>         | LCampanian    | Horseshoe Can. Fm.   | NA (2) |
| <i>Arrhinoceratops brachyops</i>     | LCampanian    | Dinosaur Park Fm.    | NA (2) |
| <i>Ojoceratops fowleri</i>           | Maastrichtian | Ojo Alamo Fm.        | NA (3) |
| <i>Eotriceratops xerinsularis</i>    | Maastrichtian | Horseshoe Can. Fm.   | NA (3) |
| <i>Torosaurus latus</i>              | Maastrichtian | Hell Creek Fm.       | NA (3) |
| <i>Torosaurus utahensis</i>          | Maastrichtian | North Horn Fm.       | NA (3) |
| <i>Nedoceratops hatchery</i>         | Maastrichtian | Laramie Fm.          | NA (3) |
| <i>Triceratops horridus</i>          | Maastrichtian | Hell Creek Fm.       | NA (3) |
| <i>Triceratops prorsus</i>           | Maastrichtian | Laramie Fm.          | NA (3) |
| <b>Hadrosauroids</b>                 |               |                      |        |
| <i>Bactrosaurus johnsoni</i>         | LCamp-Maast   | Iren Dabasu Fm.      | Asia   |
| <i>Gilmoreosaurus mongoliensis</i>   | LCamp-Maast   | Iren Dabasu Fm.      | Asia   |
| <i>Lophorothon atopus</i>            | ECampanian    | Moorestville Chalk   | NA     |
| <i>Tanius sinensis</i>               | ECampanian    | Jiangjun Fm.         | Asia   |
| <i>Telmatosaurus transsylvanicus</i> | Maastrichtian | Sampetru Fm.         | Europe |
| <i>Amurosaurus riabinini</i>         | Maastrichtian | Udurchukan Fm.       | Asia   |
| <i>Edmontosaurus annectens</i>       | Maastrichtian | Hell Creek Fm.       | NA (3) |
| <i>Aralosaurus tuberiferus</i>       | ECampanian    | Bostobe Fm.          | Asia   |
| <i>Barsboldia sicinskii</i>          | Maastrichtian | Nemegt Fm.           | Asia   |
| <i>Brachylophosaurus canadensis</i>  | LCampanian    | Judith River Fm.     | NA (1) |
| <i>Charonosaurus jiayinensis</i>     | Maastrichtian | Yuliangze Fm.        | Asia   |
| <i>Corythosaurus casuarius</i>       | LCampanian    | Dinosaur Park Fm.    | NA (1) |
| <i>Corythosaurus intermedius</i>     | LCampanian    | Dinosaur Park Fm.    | NA (1) |
| <i>Edmontosaurus regalis</i>         | Maastrichtian | Hell Creek Fm.       | NA (2) |
| <i>Gryposaurus notabilis</i>         | LCampanian    | Dinosaur Park Fm.    | NA (1) |
| <i>Gryposaurus latidens</i>          | ECampanian    | Two Medicine Fm.     | NA     |
| <i>Gryposaurus monumentensis</i>     | LCampanian    | Kaiparowits Fm.      | NA (1) |
| <i>Hadrosaurus foulkii</i>           | ECampanian    | Woodbury Fm.         | NA     |
| <i>Hypacrosaurus altispinus</i>      | Maastrichtian | Horseshoe Canyon Fm. | NA (2) |
| <i>Hypacrosaurus stebingeri</i>      | LCampanian    | Two Medicine Fm.     | NA (1) |
| <i>Kerberosaurus manakini</i>        | Maastrichtian | Tsagayan Fm.         | Asia   |
| <i>Pararhabdodon isonensis</i>       | Maastrichtian | Tremp Fm.            | Europe |
| <i>Kritosaurus navajovius</i>        | LCampanian    | Kirtland Fm.         | NA (1) |
| <i>Secernosaurus koernerii</i>       | LCamp-Maast   | Los Alamos Fm.       | SA     |

|                                            |               |                                               |            |
|--------------------------------------------|---------------|-----------------------------------------------|------------|
| "Sabinas OTU"                              | LCampanian    | Olmos Fm.                                     | NA (1)     |
| <i>Lambeosaurus lambei</i>                 | LCampanian    | Dinosaur Park Fm.                             | NA (1)     |
| <i>Lambeosaurus magnicristatus</i>         | LCampanian    | Dinosaur Park Fm.                             | NA (1)     |
| <i>Lambeosaurus laticaudus</i>             | LCampanian    | El Gallo Fm.                                  | NA (1)     |
| <i>Maiasaura peeblesorum</i>               | LCampanian    | Two Medicine Fm.                              | NA (1)     |
| <i>Nipponosaurus sachalinensis</i>         | ECampanian    | Upper Yezo Group                              | Asia       |
| <i>Olorotitan ararhensis</i>               | Maastrichtian | Udurchukan Fm.                                | Asia       |
| <i>Parasaurolophus walkeri</i>             | LCampanian    | Dinosaur Park Fm.                             | NA (1)     |
| <i>Parasaurolophus tubicen</i>             | LCampanian    | Kirtland Fm.                                  | NA (1)     |
| <i>Parasaurolophus cyrtocristatus</i>      | LCampanian    | Kaiparowits Fm.<br>Fruitland Fm.              | NA (1)     |
| <i>Prosaurolophus maximus</i>              | LCampanian    | Dinosaur Park Fm.                             | NA (1)     |
| <i>Sahaliyana elunchunorum</i>             | Maastrichtian | Yuliangze Fm.                                 | Asia       |
| <i>Saurolophus osborni</i>                 | Maastrichtian | Horseshoe Can. Fm.                            | NA (2)     |
| <i>Saurolophus angustirostris</i>          | Maastrichtian | Nemegt Fm.                                    | Asia       |
| <i>Shantungosaurus giganteus</i>           | ECampanian    | Xingezhuang Fm.                               | Asia       |
| <i>Tsintaosaurus spinorhinus</i>           | ECampanian    | Jingangkou Fm.                                | Asia       |
| <i>Velafrons coahuilensis</i>              | LCampanian    | Cerro del Pueblo Fm.                          | NA (1)     |
| <i>Wulagasaurus dongi</i>                  | Maastrichtian | Yuliangze Fm.                                 | Asia       |
| Big Bend UTEP OTU                          | LCamp-Maast   | Aguja Formation                               | NA (2)     |
| <i>Acristavus gagslarsoni</i> <sup>5</sup> | ECampanian    | Wahweap Fm.<br>Two Medicine Fm.               | NA         |
| <i>Willinaqake salitralensis</i>           | LCamp-Maast   | Allen Fm.                                     | SA         |
| <b>Sauropods</b>                           |               |                                               |            |
| <i>Aeolosaurus</i>                         | Camp-Maast    | Angostura Colorada Fm.<br>Los Alamitos Fm.    | SA         |
| <i>Alamosaurus</i>                         | Maastrichtian | Kirtland Fm. (and others)                     | NA         |
| <i>Ampelosaurus</i>                        | Camp-Maast    | Grès à Reptiles Fm.                           | Europe     |
| <i>Antarctosaurus</i>                      | Camp-Maast    | Bajo Barreal Fm.<br>Anacleto Fm. (and others) | SA         |
| <i>Isisaurus</i>                           | Maastrichtian | Lameta Fm.                                    | India      |
| <i>Jainosaurus</i>                         | Maastrichtian | Lameta Fm.                                    | India      |
| <i>Lirainosaurus</i>                       | Campanian     | Vitoria Fm.<br>Sierra Perenchiza Fm.          | Europe     |
| <i>Magyarosaurus</i>                       | Maastrichtian | Sânpetru, Sard,<br>Densus-Ciula Fms.          | Europe     |
| <i>Nemegtosaurus</i>                       | Maastrichtian | Nemegt Fm.                                    | Asia       |
| <i>Neuquensaurus</i>                       | Campanian     | Anacleto, Rio Colorado Fms.                   | SA         |
| <i>Opisthocoelicaudia</i>                  | Maastrichtian | Nemegt Fm.                                    | Asia       |
| <i>Quaesitosaurus</i>                      | Campanian     | Barun Goyot Fm.                               | Asia       |
| <i>Rapetosaurus</i>                        | Maastrichtian | Maevarano Fm.                                 | Madagascar |
| <i>Rocasaurus</i>                          | Campanian     | Allen Fm.                                     | SA         |
| <i>Saltasaurus</i>                         | Camp-Maast    | Lecho, Allen Fms.                             | SA         |
| Malagasy_Taxon_B                           | Maastrichtian | Maevarano Fm.                                 | Madagascar |

|                                        |               |                                         |        |
|----------------------------------------|---------------|-----------------------------------------|--------|
| <i>Trigonosaurus</i> <sup>6</sup>      | Maastrichtian | Marília Fm.                             | SA     |
| <b>Ankylosaurs</b>                     |               |                                         |        |
| <i>Ankylosaurus magniventris</i>       | Maastrichtian | Hell Creek Fm.                          | NA     |
| <i>Antarctopelta oliveroi</i>          | Campanian     | Santa Marta Fm.                         | Ant.   |
| <i>Dyoplosaurus acutosquameus</i>      | Campanian     | Dinosaur Park Fm.                       | NA     |
| <i>Edmontonia</i> spp.                 | Camp-Maast    | Dinosaur Park Fm.<br>Hell Creek Fm.     | NA     |
| <i>Euoplocephalus tutus</i>            | Camp-Maast    | Dinosaur Park Fm.<br>Horseshoe Can. Fm. | NA     |
| <i>Nodocephalosaurus kirtlandensis</i> | Campanian     | Kirtland Fm.                            | NA     |
| <i>Panoplosaurus mirus</i>             | Campanian     | Dinosaur Park Fm.                       | NA     |
| <i>Pinacosaurus grangeri</i>           | Campanian     | Wangshi & Djadokhta Fms.                | Asia   |
| <i>Pinacosaurus mephistocephalus</i>   | Campanian     | Bayan Mandahu Fm.                       | Asia   |
| <i>Saichania chulsanensis</i>          | Campanian     | Barun Goyot Fm.                         | Asia   |
| <i>Struthiosaurus austriacus</i>       | Camp-Maast    | Gosau & Sanpetru Fms.                   | Europe |
| <i>Struthiosaurus languedocensis</i>   | Campanian     | Unnamed unit                            | Europe |
| <i>Tarchia gigantea</i>                | Camp-Maast    | Barun Goyot Fm.<br>Nemegt Fm.           | Asia   |

Notes: 1: If a taxon is known from multiple formations we list its type formation and/or the formation(s) from which most specimens are known. See the PBDB for further details.

2: Numbers (1,2,3) for the North American taxa refer to the assignment of these taxa to three time bins in the three-bin analysis (1: 77-74 Ma; 2: 73-70 Ma; 3: 68-65 Ma)

3: We regard *Conchoraptor* as Campanian in age. Although its type specimen is from the Nemegt Formation, which we mostly regard as Maastrichtian, *Conchoraptor* has long been described as coming from the part of the Nemegt Formation that is likely Campanian in age, and this is the age assessment included in the PBDB.

4: We consider the range of *Albertosaurus* to extend into the late Campanian based on the recent discussion of *Albertosaurus* fossil discoveries in Alberta presented by Tanke and Currie (2010)<sup>71</sup>.

5: In the original Prieto-Márquez (2010) study, *Acristavus gagslarsoni* is referred to as the “Two Medicine OTU” and *Willinaqake salitralensis* as the “Salitral Moreno OTU”.

6: In the original Curry Rogers (2005) study, *Trigonosaurus* is referred to as the “Brazil Series B” taxon. Also, a terminal taxon called “Jabalpur indet.” that was included in the analysis of Curry Rogers (2005) is now referred to *Jainosaurus* (Wilson et al. 2009)<sup>72</sup>.



**Supplementary Table S2.** PCO scores for all taxa on the significant axes used for disparity calculations (those explaining 90% of total variance in each taxon-specific PCO analysis). The four disparity calculations measure the range and variance of these scores for various temporal and geographic sets of taxa. Morphospace plots can be constructed by graphically plotting various PC axes against each other (e.g., PC1 vs. PC2 scores).

**Coelurosaurs**

Ingenia,19.3,2.28,-0.15,3.18,3.63,-6.21,6.49,-1.47,4.55,6.67,-2.6,-3.53,-0.05,0.63,-8.16,-6.97,-0.83,6.7,2.3,7.53,2.03  
 Citipati,15.8,-1.11,0.96,1.8,0.94,-3.17,-0.1,-5.81,-8.38,-1.28,-24.07,-2.27,-1.66,-2.01,6.59,-4.09,0.44,0.13,-1.66,0.07,2.64  
 Rinchenia,21.72,3.93,4.26,-0.91,1.41,5.43,-4.49,0.88,3.13,0.25,3.46,3.7,7.73,-3.74,9.27,-1.37,2.37,1.81,3.72,-7.1,-2.28  
 Oviraptor,21.97,-3.51,1.97,-2.09,1.57,-4.67,4.7,4.91,0.8,1.24,-0.09,-6.68,1.01,-3.79,0.82,-2.23,-0.66,-12.24,4.61,-0.91  
 Conchoraptor,15.45,2.44,-0.7,2.86,0.72,-4.1,2.36,-8.35,-1.97,-1.4,3.52,16,-11.49,6.46,2.23,8.27,2.14,-4.27,10.5,-2.18,-0.04  
 Chirottenotes,13.4,2.95,0.1,3.42,0.76,-7.76,1.81,1.4,-15.67,-0.17,6.82,-5.83,15.39,-2.61,-2.35,9.41,-0.48,-10.17,-1.92,1.8,-1.2  
 Dromaeosaurus,-11.02,-15.23,8.97,0.97,2.5,5.22,7.83,12.81,1.65,-4.03,-8.1,9.97,5.92,1.93,-7.12,3.72,0.53,-1.68,7.11,1.26,-0.23  
 Velociraptor,-2.67,-14.52,-0.07,-11.11,1.52,-0.25,11.44,1.91,3.54,6.54,6.66,-8.8,-2.76,-2.07,14.49,-3.03,2.43,-4.29,8.39,9.09,3.52  
 Adasaurus,-10.48,-14.01,-2.7,1.04,2.73,-10.01,8.18,-4.83,-3.2,-9.29,-1.85,1.82,1.94,-2.85,1.5,-3.9,-0.43,3.08,-2.76,-8.29,-0.85  
 Tsaagan,-10.33,-9.44,7.52,-20.63,-5.95,-0.36,-5.99,-9.68,2.82,-3.99,-1.09,-2.81,2.45,-1.59,-3.39,0.52,-0.74,1.56,1.62,-4.3,-0.59  
 Saurornitholestes-2.9,-10.28,3.97,-8.26,-1.98,-9.48,9.77,-2.38,-9.15,3.27,7.54,6.94,-4.07,2.8,-5.73,-2.12,-1.69,5.31,-9.96,3.92,0.99  
 Rahonavis,1.88,-16.17,1.97,-0.81,0.63,15.9,-16.34,-10.04,-4.44,-0.32,2.29,-2.32,-0.53,2.45,-7.17,0.36,0.37,-0.95,4.19,5.92,-0.19  
 Mononykus,-1.76,2.25,-2.3,12.43,-25.21,-0.77,2.35,1.43,-3.67,4.35,2.76,-4.44,-5.1,2.13,0.32,-4.53,0.55,2.63,2.8,-3.75,-13.21  
 Shuuvia,-2.3,0.47,-3.91,9.55,-25.26,5.12,2.41,-0.03,7.68,-2.53,-1.93,4.23,7.18,-3.19,0.05,2.42,-0.81,0.01,-1.65,4.98,12.02  
 Avimimus,9.48,3.72,-3.7,3.44,3.12,-1.62,-0.65,9.51,1.72,-23.35,7.53,-8.32,-5.4,1.78,-2.28,-4.6,-0.56,2.37,2.99,-2.11,4.97  
 Struthiomimus,-5.93,17.67,6.97,-2.57,3.8,10.01,6.05,2.37,-2.68,1.49,0.2,3.2,-5.61,-14.47,-2.69,-3.14,-16.57,-5.28,2.3,-0.44,-1.96  
 Gallimimus,-6.24,17.7,5.75,-2.8,4.13,10.58,7.33,2.81,-3.74,1.36,-0.52,-1.7,-2.63,-6.4,-3.8,4.75,19.99,7.22,-1.78,-0.11,-0.24  
 Troodon,-2.53,2.34,-17.67,4.79,9.1,-1.3,-5.52,0.45,-1.12,10.69,4.79,4.71,7.68,-0.77,-3.82,-7.76,-1.98,9.58,6.13,-5.17,5.37  
 Saurornithoides,-8.86,1.25,-17.97,5.627,-2.25,4.32,-4.47,5.39,0.55,-6.38,-10.73,-2.02,2.4,-8.31,6.73,-1.05,-4.22,5.4,1.41,-6.12

Zanabazar,-10.93,4.5,-17.95,2.93,6.18,-1.91,-5.58,-2.35,5.1,-7.53,0.49,10.22,3.25,-  
4.25,7.44,-1.9,2.71,-1.27,-6.67,11.84,-9.14  
Byronosaurus,-15.49,1.53,-14.86,1.41,-0.24,3.79,-7.16,7.04,-11.35,4.68,-1.02,-1.55,-  
9.08,3.37,4.64,3.04,-0.28,-3.93,-4.04,-3.58,10.41  
Tyrannosaurus,-7.76,2.64,14.34,6.73,2.29,-13.75,-9.77,5.72,7.71,5.73,-0.29,1.43,-  
1.73,0.12,-4.53,-9.61,7.72,-14.74,-1.09,-2.26,1.64  
Albertosaurus,-7.81,2.8,14.55,6.87,3.57,-12.78,-9.51,6.25,5.18,3.16,-1.25,-3.33,-  
1.64,0.22,5.4,14.49,-6.76,12,0.74,2.73,-0.07  
Daspletosaurus,-9.47,-11.26,14.7,17.74,6.74,7.35,-2.87,-5.96,-4.16,-0.65,3.66,-3.04,-  
0.13,-2.03,5.52,-3.98,0.19,2.58,-2.6,-1.26,-2.4  
Ornithomimus,-7.07,17.6,7.16,-4,3.43,9.05,5.5,1.3,-0.35,-0.39,-1.87,-  
0.52,7.12,21.54,4.48,-4.64,-4.49,-0.49,-2.51,0.83,-1.87  
Anserimimus,-6.63,22.96,2.88,-12.91,-5.03,-7.68,-4.1,-13.17,2.82,-2.46,1.55,-1.55,0.99,-  
0.56,-0.56,0.24,0.31,-0.44,0.63,0,3.53  
Maha,5.27,-7.9,-5.62,2.33,4.58,6.33,8.55,-5.53,14.18,5.1,1.88,-2.32,0.35,0.4,0.86,6.77,-  
1.06,-3.84,-9.75,-11.61,0.9  
Balaur,5.95,-5.59,-8.5,-20.41,-5.38,-1.07,-7.64,15.47,-0.49,2.74,-3.41,0.91,0.57,-  
0.72,0.93,0.09,0.19,1.25,-0.18,-3.83,-6.7

### **Tyrannosauroids**

Dryptosaurus,3.4,-7.73,-2.95,-2.93,2.2,-1.03  
Appalachiosaurus,6.68,-0.22,0.49,-4.94,0,-5.07  
Albertosaurus,4.55,3.52,-5.77,3.72,-0.34,1.77  
Gorgosaurus,5.29,3.38,-4.83,1.89,-1.37,0.03  
Alioramus,2.39,-7.69,3.5,3.35,-3.89,3.72  
Daspletosaurus,-6.3,-0.65,2.39,6.85,3.44,-5.13  
Tarbosaurus,-10.99,0.23,-1.88,-2.81,-0.95,0.84  
Tyrannosaurus,-10.63,1.02,-1.52,-2.61,-0.75,1.57  
Bistahieversor,3.59,3.15,4.56,-1.49,6.63,4.6  
Teratophoneus,2.02,4.98,6.03,-1.02,-4.96,-1.31

### **Pachycephalosaurs**

Colepiocephale\_lambeii,-5.11,1.79,-1.67,-0.91,0.41,3.19,-0.19,1.05,-0.98,-0.66,0.5  
Gravitholus\_albertae,-5.57,0.54,-1.01,1.29,-1.6,1.74,2.02,-0.25,-1.18,1.45,0.74  
Stegoceras\_validum,-3.82,-1.44,-1.74,1.63,-3.47,-2.07,-1.75,-1.43,0.11,0.74,-0.17  
Texacephale\_langstoni,-3.84,-0.75,-2.44,-1.51,1.39,-0.24,-1.56,0.96,2.9,-0.81,-0.41  
Hanssuesia\_sternbergi,-2.96,-0.18,0.16,-1.02,2.23,-3.94,2.11,-2.38,0.07,-0.9,0.39  
Sphaerolitholus\_brevis,-0.37,-1.21,2.55,2.11,0.64,-1.36,-3.08,2.53,-1.28,0.58,-1.34  
Sphaerolitholus\_goodwini,0.39,-1.86,2.26,-3.1,-1.3,0.13,2.74,0.89,0.1,1.26,-3.55  
Sphaerolitholus\_edmontonense,1.51,-4.91,2.62,-0.63,-0.47,1.66,-1.01,-1.44,0.22,-1.05,0.02  
Sphaerolitholus\_buchholtzae,1.36,-3.18,2.71,-2.28,-2.7,-0.22,0.16,1.43,0.77,-0.11,3.23  
Alaskacephale\_gangloffii,2.03,-2.14,-0.43,3.58,-0.39,0.96,-0.19,-2.25,0.24,-0.63,-0.96  
Pachycephalosaur\_wyomingensis,3.26,-1.22,-1.24,4.1,1.16,1.23,2.58,1.13,1.58,-  
0.16,0.39  
Prenocephale\_prenes,1.49,0.14,2.55,-0.98,3.47,0.69,-0.61,-1.57,-1.18,1.76,1.54  
Tylocephale\_gilmorei,-1.01,0.75,0.81,0.02,3,0.02,0.04,1.2,0.74,-1.99,-0.32

Homalocephale\_calathoceros,1.09,4.7,1.57,-0.54,0.84,1.21,-1.41,-1.49,1.33,2.26,-0.57  
Goyocephale\_lattimorei,1.73,4.6,1.83,-0.37,-2.04,0.29,-0.04,-0.64,-2.04,-3.26,-0.51  
Wannanosaurus\_yansiensis,1.47,4.54,1.71,1.79,-1.08,-2.37,0.92,1.74,0.5,0.78,0.92  
Stygimoloch\_spinifer,3.11,-2.41,-5.2,-0.95,1.62,-1.01,0,0.99,-3.02,0.62,0.12  
Dracorex\_hogwartsii,5.26,2.26,-5.05,-2.22,-1.7,0.11,-0.74,-0.47,1.12,0.1,-0.02

### **Ceratopsids**

Albertaceratops,-5.83,4.6,-0.19,-0.09,0.02,-0.73,1.26,6.1,-0.77,-1.14,-0.36,1.6,1.15,-  
0.21,0.13  
Centrosaurus,-7.15,5.44,-0.43,0.33,0.43,-1.22,-2.22,-1.71,1.65,-2.15,0.62,-3.78,-0.6,1.5,-  
0.09  
Pachyrhinosaurus,-6.53,5.74,0.67,-0.41,0.47,1.11,0.76,-3.86,-0.71,3,-0.99,2.79,-0.5,-  
1.21,0.3  
Chasmosaurus\_belli,-1.77,-3.82,-5,0.38,1.77,2.71,-1.04,0.82,0.64,1.24,0.36,-0.43,-0.58,-  
0.2,2.73  
Chasmosaurus\_russelli,-1.9,-3.76,-5.06,-0.07,1.09,2.65,-1.05,0.71,0.43,1.06,0.69,-  
0.07,0.6,-0.04,-2.72  
Mojoceratops,-1.71,-3.35,-3.29,-1.56,-3.47,-2.7,1.1,-1.41,-4.68,-1.36,-1.19,-1.05,0.55,-  
1.37,0.41  
Vagaceratops,-0.5,-3.96,0.34,5.58,1.33,-0.41,-0.25,-1.66,1.46,-4.18,-1.44,2.78,0.14,-  
0.31,0.2  
Kosmoceratops,-1.29,-3.13,3.6,4.78,3.86,-1.71,2.42,0.52,-1.77,2.62,1.14,-  
2.28,0.51,0.16,0.1  
Agujaceratops,-1.44,-3.89,-0.62,-1.15,-2.18,-2.85,1.77,-0.27,1.37,1.07,1.54,2.2,-  
1.22,3.78,-0.85  
Utahceratops,-1.5,-3.79,3.55,-4.49,0.27,0.42,-0.76,-1.01,1.41,-0.19,0.28,-0.13,4.79,-  
0.02,-0.52  
Pentaceratops,-1.16,-3.75,3.51,-4.56,1.53,-0.22,-0.03,1.39,1.38,-0.69,-1.68,-0.42,-3.36,-  
1.4,1.06  
Coahuilaceratops,1.69,-3,0.72,-0.8,-0.41,-0.6,-0.13,-0.31,0.28,0.59,-0.19,-0.75,-2.09,-  
1.06,-1.14  
Anchiceratops,0.16,-0.55,4.15,1.55,-3.34,3.09,-3.84,0.75,-3.2,-0.23,1.79,0.55,-1.21,1.2,-  
0.01  
Arrhinoceratops,1.52,0.97,1.06,2.79,-5.06,0.02,-0.22,0.97,3.13,2.23,-1.39,-0.43,0.62,-  
1.45,0.19  
Ojoceratops,3.67,1.8,-1.5,1.7,-1.67,-2.18,-1.03,0.37,1.21,0.67,-0.32,-1.2,0.41,-1.19,-0.64  
Torosaurus\_latus,2.91,2.55,-0.36,-0.82,-1.49,1.85,3.99,-0.87,1.09,-1.81,4.32,-0.3,-0.21,-  
1.01,1.57  
Torosaurus\_utahensis,3.75,3.26,-0.23,-0.52,0.15,2.9,2.98,-0.04,-0.43,-0.51,-3.36,-1.27,-  
0.65,2.42,-1.59  
Eotriceratops,3.39,-0.05,0.89,0.22,0.53,2.28,0.51,-0.48,-0.96,-0.55,-1.44,-  
0.48,1.59,0.78,1.33  
Nedoceratops,3.37,3,0.22,-0.63,2.52,-0.32,-0.58,0.02,-0.69,-0.87,1.6,0.83,-0.56,-2.23,-  
2.89  
Triceratops\_horridus,5.15,2.79,-1.02,-1.16,1.97,-1.85,-1.69,-0.11,-  
0.62,0.34,0.22,1.04,0.13,0.81,-0.01

Triceratops\_prorsus,5.16,2.89,-1,-1.05,1.67,-2.25,-1.95,0.1,-0.23,0.87,-  
0.2,0.79,0.5,1.05,2.44

### **Hadrosauroids**

Bactrosaurus,-13.35,-23,25.31,0.87,-0.49,-6.28,-4.28,-0.31,5.9,15.32,15.73,-1.64,7.98,-  
2.37,-5.59,4.84,11.72,10.12,-0.43,-8.1,5.96,-20.09,-14.21,-15.8,5.71,-2.63,-2.01,-  
5.15,3.58,5.94,1.74,5.71,0.08,-0.46,0.97,-3.68,1.56

Gilmoresaurus,-13.38,-16.4,29.1,-2.2,2.05,-1.99,-6.8,6.07,-0.64,0.98,-1.27,-  
0.98,2.47,6.46,-3.19,2.55,2.25,-6.38,14.14,-1.78,-3.06,15.03,6.67,14.98,-8.02,3.59,-  
4.65,14.23,-6.78,8.49,2.32,9.08,1.16,3.74,-3,-1.77,-8.53

Tanius,-13.79,-18.8,17.31,7.45,1.82,1.66,12.05,-12.28,-0.72,0.62,-7.38,-1.81,-4.94,-  
4.88,13.18,13.58,4.97,4.79,-2.08,5.26,-2.8,15.49,12.12,0.81,0.1,-1.85,5.44,-  
15.37,7.43,1.15,-1.49,-3.88,-4.75,-0.28,4.07,4.56,14.91

Hadrosaurus,-6.03,4.16,-0.49,-24.29,21.05,-10.08,-23.22,-6.43,15.98,-2.19,-3.63,1.25,-  
0.1,-4.91,4.75,-2.1,2.84,-2.62,-2.08,-2.03,1.97,-0.03,-0.83,2.97,1.32,0.1,-2.13,2.93,-0.91,-  
2.22,0.94,-3.71,0.35,-1.04,1.39,-1.04,5.33

Telmatosaurus,-17.34,-23.19,7.17,-1.29,-10.44,18.72,12.72,14.08,-12.09,-  
15.25,8.15,3.06,-1.12,-1.68,5.91,-9.95,-10,0.83,6.35,-1.19,-5.94,-5.98,0.99,-  
4.32,3.51,3.14,-1.06,2.78,-1.65,-6.92,-0.37,-5.46,1.79,-2.4,2.36,-2.35,-3.4

Lophorhothon,-16.2,-8.16,17.43,-2.1,0.41,-8.11,-2.82,-2.17,-2.15,-1.92,-14.9,9.21,-1.81,-  
0.41,-3.4,-17.74,-12.17,-5.21,-22.73,6.82,-2.8,-10.61,1.13,8.67,-6.17,0.35,7.7,-1.15,4.35,-  
10.16,-5.28,-6.01,4.26,-1.08,-9.61,11.74,0.32

Wulagasaurus,-3.05,-11.63,-20.62,8.43,-0.14,-3.78,-1.65,-8.93,-11.8,13.5,-  
14.23,8.18,14.32,-9.94,-9.24,6.17,-2.94,-1.85,-9.14,-10.87,4.32,4.78,6.67,-  
5.75,3.59,6.93,7.01,6.69,-3.24,-2.05,4.72,12.53,-1.16,1.03,1.24,-9.79,-1.28

Sahaliyania,14.73,0.59,5.12,-0.9,-2.71,-6.46,0.57,7.85,2.92,1.61,8.48,-14.18,7.47,7.58,-  
25.39,-10.09,-8.5,2.69,-12.97,-7.17,-6.34,14.76,-9.19,-5.41,1.42,7.31,8.53,-5.1,-7.1,-  
0.21,-1.78,-14.95,-9.71,1.9,4.51,1.82,5.1

Amurosaurus,15.4,-1.46,1.75,-7.51,1.65,-0.89,5.41,2.93,2.7,-4.08,12.98,-14.51,-  
3.97,0.2,4.35,0.16,-5.63,-4.4,-19.39,-2.6,13.01,-3.82,16.76,11.71,8.38,0.38,7.24,-  
9.08,5.12,9.7,7.92,13.95,6.59,-0.79,-5.23,-6.54,-19.31

Aralosaurus,-5.13,-17.33,-9.83,-3.83,9.62,3.63,-3.89,-1.58,9.91,-7.73,-12.27,-4.56,-9.57,-  
0.04,-2.8,-0.51,-3.31,-13.11,5.21,-1.87,17.92,-0.83,-5.46,-8.33,8.46,-10.42,-5.43,-8.01,-  
9.42,9.11,-1.01,-13.27,4.44,-1.29,-4.81,4.29,-1.93

Brachylophosaurus,-8.9,4.82,-6.15,5.52,0.6,-27.6,-1.63,13.12,-9.58,-13.53,-1.02,-  
4.78,5.12,-4.78,-4.15,1.44,8.29,5.82,-0.95,-11.02,-12.57,-3.5,24.94,-8.75,2.14,-14.32,-  
15.96,-0.94,-4.8,-0.39,-4.52,-5.25,2.4,-1.72,-0.56,1.74,-1.05

Maiasaura,-9.25,4.42,-4.87,4.54,-2.32,-27.64,-3.17,11.67,-10.28,-15.27,-1.51,-0.59,-  
3.12,-0.76,12.97,4.52,2.55,-4.89,11.4,-0.93,10.41,1.16,-11.01,-5.25,3.86,23.92,19.71,-  
0.41,8.56,-0.75,5.45,-2.42,0.6,1.06,1.06,0.3

TwoMed,-13.61,-11.37,-17,10.36,-2.27,-15.71,1.27,2.63,-2.68,-1.31,5.52,-5.62,-  
3.53,6.15,-9.35,-0.07,-4.93,2.01,1.27,10.93,-0.79,8.41,-13.75,22.21,-7.11,-6.9,-8.7,-  
1.01,3.38,10.58,-2.93,9.33,-1.58,-0.96,1.65,-2.68,8.83

Charonosaurus,11.19,-2.1,1.15,2.32,-5.89,-1.45,-7.55,1.26,-1.51,1.2,0.58,-  
3.62,4.5,9.41,21.23,4.48,-12.76,-14.11,0.9,-17.33,-0.73,0.82,-9.05,-5.19,-13.2,-  
15.22,2.96,-2.71,-13.73,-15.2,-6.87,12.41,-10.53,6.6,-1.7,1.45,-1.89

Corythosaurus\_cas,20.04,-6.31,-2.15,-5.32,2.64,0.95,7.84,-8.79,-8.61,-0.01,1.4,-  
0.17,0.7,-7.99,-1.82,-16.31,18.82,-10.09,2.96,2.43,-2.44,-0.03,-0.83,-0.83,-  
11.91,0.93,2.69,-3.6,-2.99,2.27,-3.28,-2.63,16.17,31.02,7.2,-8.01,2.17  
Corythosaurus\_int,19.81,-6.32,-2.26,-5.75,2.8,0.78,7.37,-8.98,-10.06,1.44,0.76,0.6,1.59,-  
6.14,-1.34,-15.1,17.25,-11.64,4.74,2.43,0.48,-0.95,1.68,-3.84,-14.31,3.71,1.67,1.2,-  
3.68,6.37,0.67,3.04,-15.64,-31.97,-2.75,3.79,-2.54  
Hypacrosaurus\_ste,19.26,-2.66,1.72,-7.29,4.15,1.55,5.48,-7.47,-4.75,-5.19,-4.52,2.41,-  
5.44,-12.58,-0.94,0.04,3.58,0.59,2.34,-11.18,-19.68,10.3,-18.66,7.4,27.48,-1.38,-8,-  
0.99,5.69,-6.63,3.34,9.79,0.92,0.19,-10.38,8.7,-4.07  
Hypacrosaurus\_alt,18.3,-2.77,1.87,-6.28,1.95,1.77,7.21,-4.29,-4.07,-3.12,0.39,6.19,-  
18.25,-16.08,-11.25,5.4,-12.56,8.87,-1.75,-15.03,3.35,-8.47,-1.98,6.91,-19.44,4.37,-  
0.97,7.5,-0.78,1.35,-0.47,-11.02,0.04,-0.31,3.47,-0.47,-0.65  
Lambeosaurus\_lam,18.32,-5.74,-2.76,-7.68,5.67,1.12,2.32,-6.55,-8.69,1.26,-  
4.61,5.4,22.1,13.4,8.07,0.51,-7.32,15.11,4.03,6.22,7.52,0.45,3.5,-0.39,2.26,-1.27,-  
5.35,7.88,7.32,11.05,8.92,-12.67,-16.63,13.81,-6.77,10.99,-7.83  
Lambeosaurus\_mag,18.34,-4.84,-1.67,-7.36,7.29,-0.91,1.62,-4.59,-4.97,2.35,-  
0.02,4.6,20.35,14.41,5.62,6.44,-5.97,8.31,4.15,2.15,-2.06,1.82,-2.25,5.85,1.46,-  
1.22,3.51,-6.12,-0.27,-7.95,-9.42,-4.88,28.56,-18.77,6.95,-9.13,3.75  
Edmontosaurus\_ann,-10.28,11.92,-2.6,5.48,16.35,3.75,17.22,17.42,5.13,18.3,-  
4.43,4.5,0.72,4.51,-0.63,-0.74,-2.58,-6.93,3.91,-4.62,-4.24,-3.38,1.77,3.75,-2.91,0.3,-0.5,-  
9.89,-9.39,-2.6,31.7,0.12,4.61,-0.44,-0.18,5.26,9.66  
Edmontosaurus\_reg,-10.19,11.63,-2.33,3.56,16.69,4.13,16.15,16.75,6.8,17.81,-  
1.78,6.84,1.57,-2.05,2.05,-0.68,-3.27,-11.61,1.18,-6.41,1.57,2.49,0.77,-  
1.73,5.56,0.85,1.29,7.58,14.68,10.05,-30.43,-1.09,-4.34,1.41,-0.82,-2.87,-2.12  
Kerberosaurus,-24.06,-4.14,-14.33,-7.97,15.31,5.3,-2.31,-3.26,9.03,4.77,12.58,-  
9.18,0.58,-0.68,6.59,2.52,11.57,5.26,-3.82,1.7,-12.18,-3.04,3.84,6.11,-  
4.23,9.31,2.08,11.46,2.71,-19.73,1.76,-6.52,-6.71,2.18,3.43,0.31,-8.53  
Nipponosaurus,13.5,-1.69,0.23,4.4,3.8,0.8,-0.02,5.2,5.68,0.28,-6.87,-4.33,-10.44,18.29,-  
11.95,15.92,10.76,-2.89,7.68,13.88,-6.26,-2.43,-0.97,-2.03,0.94,0.38,5.07,-8.7,-5.04,-  
8.33,-5.34,-3.41,-3.1,-0.14,2.37,-0.35,-19.88  
Lambeosaurus\_lat,21.32,0.68,-4.11,-2.49,3.55,-0.79,0.19,6.01,3.33,-0.57,10.19,-7.93,-  
3.17,-2.79,6.97,-1.86,3.97,5.17,7.04,0.89,9.97,-4.77,2.68,6.24,-2.17,-5.66,-  
0.23,2.86,1.21,-1.01,-3.17,-0.56,1.02,0.29,-11.45,8,19.88  
Velafrons,15.3,-4.86,2.29,-4.47,1.39,-3.19,-2.95,-1.43,-4.66,2.55,-2.6,2.06,-12.62,6.22,-  
13.76,-6.48,-9.56,-3.75,12.93,8.68,4.03,-7.86,11.54,-4.34,10.05,-13.38,5.74,7.77,17.63,-  
15.46,5.73,8.85,-9.64,2.02,12.62,-8.89,9.69  
Kritosaurus,-11.39,10.02,3.27,-8.06,-14.33,0.5,8.79,0.32,-1.15,-3.97,-  
3,7.99,0.98,3.88,1.64,13.66,18.8,-3.34,-19.84,9.65,6.37,5.63,-6.58,0.44,7.2,-  
17.55,10.95,14.01,-9.41,-0.21,2.52,-2.1,-3.68,-0.07,2.38,-3.56,5.33  
Gryposaurus\_not,-12.97,9.13,-2.28,-4.85,-18.98,4.93,4.41,-16.84,5.86,5.09,-7.4,-  
19.94,2.35,2.66,-3.34,-0.62,-4.21,0.49,13.23,-4.81,-2.66,-  
13.54,10.23,8.55,13.24,10.87,8.63,6.95,-16.84,4.94,-8.32,0.95,0.14,0.92,-2.99,3.23,10.13  
Gryposaurus\_lat,-9.8,6.26,-7.2,1.88,-12.21,4.43,-0.3,-8.63,4.51,3.32,-7.25,-19.49,-  
4.14,5.99,4.44,-2.01,-2.36,-2.2,-0.13,-7.06,-13.11,2.84,-6.53,-12.68,-11.91,-  
12.24,4.87,11.04,23.31,11.03,11,-5.53,13.19,-4.74,-1.21,1.59,-5.43

Gryposaurus\_mon,-12.46,12.24,2.74,-11.59,-16.09,1.13,0.56,-7.68,10.95,-1.31,-7.98,-  
4.11,9.55,-4.92,-3.23,1.39,-1.71,-3.17,2.36,-0.32,7.83,6.86,1.28,-0.79,-8.25,8.91,-18.09,-  
21.94,12.43,-9.51,-1.4.41,-8.24,1.27,5.63,-5.53,-1.69  
Olorotitan,15.29,-2.39,-1.26,-1.01,4.51,-0.77,0.55,0.33,-6.81,5.88,1.7,-9.34,-  
13.66,7.67,14.15,4.19,-7.69,-1.85,-17.37,15.43,-8.68,-0.87,0.15,-16.86,2.51,17.25,-  
18.89,5.09,-6.65,5.53,-2.56,7.33,-0.4,1.12,4.31,-1.79,9.95  
Parasaurolophus\_wal,13.75,-2.12,-0.88,8.92,-9.84,7.17,-20.21,13.3,4.68,9.09,-5.15,1.08,-  
4.77,-13.71,15.85,-10.06,-0.31,8.98,-0.63,-1.33,-6.18,3.08,0.36,11.53,6.53,-4.62,5.42,-  
5.08,-3.77,8.65,3.05,-13.29,-9.16,-3.73,14.13,-16.82,-2.32  
Parasaurolophus\_cyr,12.25,-2.18,2.8,16.23,-16.69,6.92,-8.75,10.47,3.42,4.77,-6.22,-  
0.5,2.52,0.84,-2.33,-0.15,9.64,-6.82,-4.72,-0.69,16.48,0.49,-1.55,5.35,2.84,9.1,-  
20.7,15.87,4.96,-12.81,3.75,-6.68,9.82,-3.32,-2.26,2.43,1.02  
Parasaurolophus\_tub,11.62,-6.67,-9.25,1.32,-10.08,10.58,-20.08,15.03,5.43,6.18,-  
8.56,8.3,-1.36,-2.9,-5.19,4.62,5.97,10.44,0.93,6.82,-9.12,-1.66,6.8,-6.27,-  
6.81,3.93,11.08,-8.91,2.7,4.3,-5.53,12.56,5.22,3.65,-12.19,15.98,1.47  
Prosaurolophus,-12.46,10.63,-1.17,9.47,9.79,12.6,-4.36,-8.05,-5.35,-6.07,1.61,5.58,-  
17.37,19.71,-1.5,-14.05,8.91,22.02,-3.4,-19.22,13.09,12.16,2.53,-3.05,-1.91,2.82,1.14,-  
1.32,-1.17,-3.05,-3.22,6.84,0.8,-0.73,-2.77,-2.62,2.5  
Secernosaurus,-12.08,4.21,-3.64,-6.44,-11.02,-5.85,-1.6,-11.63,-3.29,12.41,8.82,19.26,-  
12.78,1.98,0.58,-2.42,-6.87,-4.4,7.22,3.42,0.35,9.61,5.7,-9.32,6.51,1.59,-5.1,-3.41,-  
8.08,3.92,1.76,-10.34,6.15,-0.65,-2.33,-0.19,-9.67  
Salitral,-9.35,7.88,-10.29,-4.3,-15.09,-10.22,-4.03,-6.67,-3.42,14.46,23.35,13.47,-  
4.87,0.53,1.78,-2.5,-3.6,0.06,1.52,4.55,-1.47,-3.51,-2.41,6.43,-1.65,-3.98,-1.17,-  
3.72,0.74,-1,-1.11,-0.16,0.43,0.42,-3.48,6.68,-2.69  
UTEF,-12.49,-1.03,-17.51,-26.77,-8.51,17.97,5.57,17.47,-0.51,-14.12,4.61,4.26,6.58,-  
0.68,-4.51,3.27,1.63,0.5,-1.42,0.32,2.25,1.89,-1.67,-1.92,-1.2,-0.6,-1.34,-3.89,1.7,2.69,-  
0.14,4.75,-2.08,0.61,1.6,-0.79,5.22  
Saurolophus\_osb,-8.28,12.3,2.28,14.44,10.94,14.98,-16.51,-7.47,-9.74,-9.27,10.8,-  
0.32,7.88,-5.93,-4.78,4.46,-3.87,-10.48,-1.44,2.02,2.3,-0.89,0.61,0.69,4.16,-  
1.75,0.9,0.04,-0.1,6.81,-0.26,4.5,3.52,-0.78,26.63,23.47,-1.27  
Saurolophus\_ang,-8.15,12.52,2.58,16.87,10.07,14.83,-14.14,-7.37,-11.94,-7.58,10.73,-  
2.86,6.87,-5.06,-6.2,8.62,-3.55,-10.58,1.03,8.73,-4.57,-1.37,0.07,-1.87,-0.09,-1.02,1.32,-  
5.12,2.56,-1.3,1.98,-8.09,-3.61,1.08,-26.67,-19.85,6.14  
Shantungosaurus,-8.97,9.63,1.93,4.55,7.4,-1.66,8.47,2.48,1.25,3.54,-3.81,-13.01,2.08,-  
23.15,-0.14,-7.09,-9.99,19.58,6.23,19.56,11.56,8.77,-7.17,-9.74,-4.09,-7.96,1.65,5.74,-  
11.23,-9.08,-1.76,8.01,5.04,-0.99,-2.14,1,-11.14  
Pararhabdodon,14.51,1.5,-6.08,27.12,-5.52,-2.78,16.44,-8.88,16.37,-5.81,7.19,3.75,3.89,-  
1.76,4.64,-1.71,4.9,-0.17,-0.99,-1.62,2.23,-4.82,1.92,4.72,2.24,-1.17,0.19,-4.51,2.11,-  
6.81,-2.68,-5.13,-3.48,2.25,0.18,6.91,-4.53  
Tsintaosaurus,7.93,-1.09,1.37,9.08,0.8,-3.21,3.82,-6.15,33.67,-  
21.48,3.33,18.81,5.17,0.93,-1.29,-3.71,-7.73,0.86,0.94,3.41,-9.29,-0.17,1.5,-8.28,-  
3.03,4.64,1.17,10.12,-3.69,8.19,4.74,9.37,0.87,-1.03,1,-8.61,3.31  
Sabinosaur,-11.86,11.41,-2.96,4.79,4.42,0.8,2.54,-3.18,-9.75,-5.84,-17.51,3.51,-  
1.24,6.88,1.84,-3.85,3.3,8.06,-1.66,1.77,-4.31,-24.31,-12.58,8.52,-1.58,0.28,-7.81,-6.22,-  
2.77,8.35,-1.54,4.36,-5.26,1.75,4.58,-7.41,-5.54

Barsboldia,13.98,42.31,26.27,-7.86,-4.07,-1.62,1.72,5.21,-4.28,-1.09,-0.98,3.14,0.92,-  
1.5,0.44,0.89,1.7,1.93,3.24,0.11,-1.67,0.07,0.48,-1.09,-  
1.48,0.17,0.11,0.63,1.34,2.88,0.45,1.17,1.51,-0.58,0,-0.24,0.73

### **Ankylosaurs**

Ankylosaurus\_marginoventris,-5.13,2.05,-0.19,-11.99,8.86,3.4,1.29,-6.06,4.57  
Antarctopelta\_oliveroi,-3.83,-14.46,-1.13,-6.36,0.51,-3.79,0.54,2.02,-0.8  
Edmontonia,11.63,-7.96,-9.75,0.65,1.41,-3.91,0.35,4.42,-0.67  
Euoplocephalus\_tutus,-6.38,1.09,-3.95,3.15,-0.51,14.87,3.13,2.82,-4.96  
Nodocephalosaurus\_kirtlandensis,-12.99,-9.76,4.09,4.88,0.8,-1.08,1.57,0.99,0.3  
Panoplosaurus\_mirus,14.15,-2.89,3.04,4.23,4.44,0.34,0.27,-6.49,-7.99  
Pinacosaurus\_grangeri,-6.23,0.84,1.09,-4.54,-11.74,-1.31,-8.65,-4.91,-4.88  
Pinacosaurus\_mephistocephalus,-1.07,8.3,5.26,-4.19,-4,-4.23,8.64,8.71,-2.2  
Saichania\_chulsanensis,-7.34,2.81,-0.89,9.39,-1.48,-5.13,6.38,-7.85,4.32  
Struthiosaurus\_austriacus,12.88,-3.7,3.52,1.05,-7.18,6.1,-1.27,0.81,10.79  
Struthiosaurus\_languedocensis,9.08,7.42,8.99,-1.57,2.43,-1.19,-0.11,-0.47,-1.62  
Tarchia\_gigantea,-5.66,4.7,2.9,5.73,7.39,-1.52,-10.9,6.49,2.2  
Dyoplosaurus\_acutosquameus,0.9,11.56,-12.97,-0.43,-0.91,-2.55,-1.24,-0.47,0.93

### **Sauropods**

Aeolosaurus,13.42,-6.66,-8.38,-8.56,3.82,6.82,14.85,3.2,-4.46,-12.8,4.1  
Alamosaurus,11.6,-10.23,6.6,4.29,3.38,3.13,-8.48,4.47,-20.37,2.29,-3.91  
Ampelosaurus,-5.8,-4.01,-2.85,-12.81,0.17,-16.03,0.48,-3.86,-3.32,2.61,-8.24  
Antarctosaurus,-10.45,-11.83,17.99,7.38,-4.61,-1.82,-4.59,-0.93,0.51,-2.27,2.02  
Jainosaurus,-22.29,-2.56,-3.94,-13.42,-1.02,-6.4,-2.23,2.74,-2.71,1.32,4.34  
Lirainosaurus,-8.84,-3.27,4.9,-6.5,-13.66,9.71,3.29,1.37,0.24,-0.06,8.43  
Magyarosaurus,11.34,-10.77,1.08,-2.39,3,3.42,-6.12,-19.04,7.71,4.35,7.88  
Nemegtosaurus,-18.44,3.11,-8.29,11.7,15.66,-6.35,1.79,-2.24,-3.48,-2.88,8.56  
Neuquensaurus,11.74,10.92,3.5,4.5,-9.08,-6.82,-9.47,4.23,2.2,-13.76,3.64  
Opisthocoelicaudia,9.71,-13.13,7.04,5.19,5.85,-7.63,7.76,14.97,13.07,6.25,0.16  
Quaesitosaurus,-3.81,27.01,8.29,-1,0.91,-1.47,0.53,1.02,1.83,0.7,0.59  
Rapetosaurus,-3.14,0.78,-9.68,-2.91,12.68,12.62,-14.48,5.5,7.97,-2.9,-5.68  
Rocasaurus,13.26,12.81,-3.75,-4.38,-1.5,4.52,-0.59,5.68,-3.31,15.8,5.66  
Saltasaurus,1.06,4.63,-8.27,16.11,-3.68,0.52,9.02,-6.71,-3.66,3.98,-1.5  
Isisaurus,9.5,8.26,15.02,-5.45,8.15,1.24,7.29,-8.96,1.28,-2.96,-9.54  
Trigonosaurus,-21.48,-2.06,-1.42,5.08,-7.82,11.56,4.55,0.52,2.78,0.95,-10.83  
Malagasy\_Taxon\_B,12.62,-3,-17.86,3.18,-12.25,-7.02,-3.59,-1.96,3.72,-0.62,-5.69

## Supplementary Methods

**Disparity Measures and Fossil Record Biases.** All measures of biodiversity using the fossil record may be susceptible to biases caused by uneven preservation and incomplete sampling. One particular worry is that time intervals or regions that are better sampled may appear to be more diverse (i.e., have a greater number of species, have species with a greater disparity of morphologies, etc.). A number of meticulous studies over the past decade have clearly shown that measures of species richness over time are often significantly correlated with sampling, and therefore, that uneven sampling may often be a confounding bias in understanding the true pattern of diversity over time<sup>16,17</sup>. Several prominent case studies of vertebrate taxa have shown this to be the case, including studies of dinosaurs<sup>10-15,51</sup>. Furthermore, there is also a concern that previous compilations of dinosaur species diversity have included several juveniles and sexual morphs as separate taxa, thus inflating species counts in some intervals (particularly the Maastrichtian<sup>18-20</sup>). Thus, there is genuine worry that measures of species-level diversity over time may paint a severely biased picture of dinosaur biodiversity.

Measures of morphological disparity are more robust to the sampling biases that often plague studies of species richness (and absolute faunal abundance<sup>21</sup>). This is supported both by theoretical<sup>23</sup> and empirical<sup>24</sup> studies. Wills et al.<sup>23</sup> showed that variance-based disparity metrics are largely insensitive to sample-size differences, as would be expected for variance-based statistics (which measure the average dissimilarity among taxa and not the entire range of their variability). In other words, the morphological variance of a group can be reasonably calculated based on only a few specimens, and after this critical number is reached (usually 3–5 taxa) then the addition of further specimens does not cause a substantial increase or decrease in the variance metric. This is graphically illustrated by the rarefaction plots in Figs. 3–4 and Supplementary Figure S1: note how variance measures plateau for a group after a few taxa are sampled. What this means is that, as long as a few specimens are available for sampling from each interval, comparisons between time intervals that have not been subjected to even sampling should give reasonable results. This is borne out by an empirical study of the pterosaur fossil record<sup>24</sup>, which shows that there are relatively few significant correlations between curves of pterosaur morphological variance (disparity per time interval) and sampling (a proxy measuring the amount of fossil sampling in each time interval) across the Mesozoic. On the contrary, other studies have shown that there is a significant, and confounding, relationship between pterosaur species richness and sampling: intervals of high species richness are usually those that are better sampled than other intervals<sup>52</sup>.

Furthermore, Wills et al.<sup>23</sup> showed that range-based disparity metrics are largely insensitive to taxonomic lumping and splitting, as would be expected for range-based statistics (which measure the entire range of the variability of taxa, not their average dissimilarity from each other). In other words, whether two morphologically similar specimens are lumped together into a single species or treated as separate species should not make much difference to the range-based calculations. This occurs because range measures the overall variability among taxa—basically, an area defined by the most extreme morphologies in a morphospace—and whether there is a single specimen of one taxon or two morphs of that taxon sitting close together in morphospace usually does not



make a difference to the overall spread of the entire morphospace. This is graphically illustrated by the plots showing range-based disparity for pachycephalosaurs, both including and excluding the controversial taxon *Dracorex* (possibly a juvenile *Pachycephalosaurius*) in Supplementary Figure S2: note how there is little difference between these measures. What this means is that range-based measures should not change much between analyses that include and exclude potential juveniles or sexual morphs, so long as at least one member of the taxon is included in the analysis (and all members of the taxon are generally more morphologically similar to each other than they are to other taxa). This is clearly not the case in species richness compilations, as adding juveniles or sexual morphs can drastically inflate richness counts (which, after all, are simple counts and not measures of statistical variance or range as are disparity calculations).

**Discrete Character Datasets.** We measured the morphological disparity of seven dinosaur subgroups using discrete character datasets (see main text). Our research group has compiled three of these datasets<sup>28,29,32</sup> and the four additional datasets are taken from the literature. The taxa included in each dataset are listed in Table S1, along with their temporal and provenance information. Due to low sample sizes and the ability to separate taxa only into Campanian and Maastrichtian bins, we consider our sauropod and ankylosaur analyses to be preliminary. These are perhaps likely to change with additional discoveries and, especially in the case of sauropods, the creation of large phylogenetic datasets that incorporate many fragmentary and newly-discovered Late Cretaceous titanosaurs.

We chose a clade-specific set of analyses for two reasons. First, compiling a single dataset of anatomical features in all (or most) Late Cretaceous dinosaurs would be exceedingly difficult and prone to error, as it would require stitching together many individual cladistic datasets and homologizing characters across a wide range of anatomically, functionally, and ecologically diverse taxa. Second, we prefer a clade-specific approach as it better allows us to tease apart disparity trends in different dinosaur subgroups, which should lead to a richer understanding of dinosaur evolution and biodiversity during the Late Cretaceous.

Each dataset we used was originally compiled to be used for a phylogenetic analysis. The use of such phylogenetic datasets is a common practice in studies of vertebrate disparity<sup>24,36,37,53-60</sup>. Although possibly biased by phylogenetic signal and loss of information due to binning into discrete states, cladistic characters take into account a large range of information from across the skeleton that is difficult to extract with other methods (e.g. linear or geometric morphometrics, which cannot easily convey the complexities of a three-dimensional vertebrate skeleton<sup>26, 61-63</sup>). The use of cladistic characters is also ideal for the present study, as a large amount of recent systematic work has focused on the relationships of Late Cretaceous dinosaurs, producing a ready source of data. Although we utilize characters that were devised for cladistic analysis, our disparity analysis treats these characters phenetically (i.e., disparity measures the overall variability of anatomical features among the organisms in question based on distance statistics, without any information on the degree of relationships of the organisms). We note that one potential issue with cladistic datasets is that they do not often include autapomorphies of the terminal taxa. This is the case with the datasets that we use here,

and we chose not to add autapomorphies for two reasons. First, there is no available published source of autapomorphies for all taxa included in the analysis. Second, because not all of the included taxa have been studied in equivalent detail, it is likely that adding autapomorphies may introduce a bias (taxa that have been better described, or described more recently, will likely have more autapomorphies included, which would serve to artificially inflate the difference between that taxon and less-studied taxa, thus inflating disparity).

We note that three tyrannosauroids, *Albertosaurus*, *Daspletosaurus*, and *Tyrannosaurus*, appear in both the coelurosaur and tyrannosauroid datasets. Tyrannosauroids are a subset of coelurosaurs, but their full diversity of ~20 taxa has yet to be incorporated into a higher-level phylogenetic dataset for all coelurosaurs<sup>28,29,64</sup>. On the contrary, the coelurosaur dataset we use includes only the three aforementioned tyrannosauroid exemplars. We retained these three taxa in the analysis because we wish to represent, as best as currently possible, the entire breadth of coelurosaur anatomical diversity in the coelurosaur analysis and ensure that we are analyzing the disparity of a monophyletic clade. Because some cladistic analyses recover tyrannosauroids nested within Coelurosauria and not at its base<sup>65</sup>, by excluding tyrannosauroids we would render the analyzed subset of coelurosaurs polyphyletic or paraphyletic. We note, however, that because the three tyrannosauroid exemplars, which are very similar in overall anatomy and body size, occur in both the late Campanian (*Albertosaurus*, *Daspletosaurus*) and Maastrichtian (*Albertosaurus*, *Tyrannosaurus*), their inclusion should not strongly affect the disparity comparisons between these two time bins. In other words, the three tyrannosauroids should affect the late Campanian and Maastrichtian calculations approximately equally.

The ceratopsid dataset that we use is focused primarily on one of the two major subclades of ceratopsids, Chasmosaurinae, and includes only a small number of representatives of the other subclade, Centrosaurinae. Because centrosaurines are (as far as is currently known) restricted to the Campanian, our calculated values of Campanian disparity for ceratopsids may be underestimates. However, despite this bias, our results still show Campanian ceratopsid disparity to be significantly higher than Maastrichtian disparity for all metrics. Thus, if anything, including more centrosaurines would lead to higher Campanian disparity values and a more precipitous Campanian–Maastrichtian decline. Additionally, we are not able to include non-ceratopsid ceratopsians in our dataset due to low sample sizes, especially in the Maastrichtian time bin, and the lack of a global ceratopsian phylogeny that includes ceratopsids and non-ceratopsid ceratopsians. We note that there is a high diversity of non-ceratopsid ceratopsians in the Campanian of Asia (four taxa in the recent phylogenetic analysis of Makovicky<sup>66</sup>), but no known taxa in the Maastrichtian. This may indicate that there was a considerable disparity decrease in these Asian herbivores (contra the pattern in the larger-bodied Asian hadrosauroids described below), and this issue deserves further study as new specimens are found and cladistic datasets are expanded.

We also note that our pachycephalosaur and ceratopsid datasets include some taxa whose taxonomic status is subject to debate, as some workers argue that they are distinct taxa and others regard them as juveniles (or other variants) of other, well-known taxa (e.g., pachycephalosaurs<sup>19,67</sup>; ceratopsids<sup>20,68-70</sup>). Fortunately, range-based disparity metrics are largely robust to disagreements in taxonomic lumping and splitting<sup>23</sup>, so these

debates should have little influence on these metrics. Furthermore, in the case of pachycephalosaurs, we calculated the Maastrichtian disparity values both with and without the controversial *Dracorex*; the results were statistically indistinguishable from each other and both results were statistically indistinguishable from the Campanian disparity values (Supplementary Figure S2). In the case of ceratopsids we retained two species of *Torosaurus* in the Maastrichtian and 68–65 Ma time bins, although it has been argued that all specimens belonging to them represent old individuals of *Triceratops*<sup>20</sup>. We note that this is a conservative approach, as by including them we are retaining additional taxa in the Maastrichtian and 68–65 Ma bins, which should (in general) increase the disparity in this bin and make it more difficult to reject the null hypothesis of no disparity difference between late Campanian and Maastrichtian ceratopsids. However, even when calculated with the two species of *Torosaurus*, Maastrichtian ceratopsid disparity is significantly lower than late Campanian disparity on all four metrics (similarly, 68–65 Ma disparity is significantly lower than 77–74 Ma disparity in the three-bin analysis). Therefore, we consider the Campanian-Maastrichtian ceratopsid disparity decline as a robust result, and do not consider the inclusion of *Torosaurus* to bias or substantially impact the study. If anything, if *Torosaurus* is synonymous with *Triceratops* then Maastrichtian ceratopsid disparity is surely lower than we have calculated and the terminal Cretaceous ceratopsid disparity decline is more precipitous.

**Analysis of Campanian-Maastrichtian Disparity.** In addition to the two binning schemes used in the main text, we also present a supplementary analysis in which disparity is calculated coarsely for Campanian and Maastrichtian bins. The results are shown in Supplementary Figure S3; they agree with the late Campanian–Maastrichtian results in nearly every case (except that they show a significant global hadrosauroid decrease on two metrics, whereas this is insignificant for the late Campanian–Maastrichtian measures).

## Supplementary References

51. Butler, R. J., Benson, R. B. J., Carrano, M. T., Mannion, P. D. & Upchurch, P. Sea-level, dinosaur diversity, and sampling biases: investigating the ‘common cause’ hypothesis in the terrestrial realm. *Proc. R. Soc. B* **278**, 1165-1170 (2011).
52. Butler, R. J., Barrett, P. M., Nowbath, S. & Upchurch, P. Estimating the effects of the rock record on pterosaur diversity patterns: implications for hypotheses of bird/pterosaur competitive replacement. *Paleobiol.* **35**, 4432-4446 (2009).
53. Brusatte, S. L., Benton, M. J., Lloyd, G. T., Ruta, M. & Wang, S. C. Macroevolutionary patterns in the evolutionary radiation of archosaurs (Tetrapoda: Diapsida). *Earth and Environmental Science Transactions of the Royal Society of Edinburgh* **101**, 367–382 (2011).
54. Brusatte, S. L., Montanari, S., Yi, H.-Y. & Norell, M. A. Phylogenetic corrections for morphological disparity analysis: new methodology and case studies. *Paleobiol.* **37**, 1-22 (2011).
55. Ruta, M. Patterns of morphological evolution in major groups of Palaeozoic Temnospondyli (Amphibia: Tetrapoda). *Sp. Pap. Palaeontol.* **81**, 91-120 (2009).
56. Cisneros, J. C. & Ruta, M. Morphological diversity and biogeography of procolophonids (Amniota: Parareptilia). *J. Syst. Palaeontol.* **8**, 607-625 (2010).
57. Young, M. T., Brusatte, S. L., Ruta, M. & Andrade, M. B. The evolution of Metriorhynchoidea (Mesoeucrocodylia, Thalattosuchia): an integrated approach using geometric morphometrics, analysis of disparity and biomechanics. *Zool. J. Linn. Soc.* **158**, 801–859 (2010).

58. Prentice, K. C., Ruta, M. & Benton, M. J. Evolution of morphological disparity in pterosaurs. *J. Syst. Palaeontol.* **9**, 337-353 (2011).
59. Thorne, P. M., Ruta, M. & Benton, M. J. Resetting the evolution of marine reptiles at the Triassic-Jurassic boundary. *Proc. Natl Acad. Sci. USA* **108**, 8339-8344 (2011).
60. Benson, R. B. J., Evans, M. & Druckenmiller, P. S. High diversity, low disparity and small body size in plesiosaurs (Reptilia, Sauropterygia) from the Triassic-Jurassic boundary. *PLoS ONE* **7(3)**, e31838 (2012).
61. Foote, M. Morphological disparity in Ordovician-Devonian crinoids and the early saturation of morphological space. *Paleobiol.* **20**, 320-344 (1994).
62. Foote, M. Morphological diversification of Paleozoic crinoids. *Paleobiol.* **21**, 273-299 (1995).
63. Foote, M. Ecological controls on the evolutionary recovery of post-Paleozoic crinoids. *Science* **274**, 1492-1495 (1996).
64. Turner, A. H., Pol, D., Clarke, J. A., Erickson, G. M. & Norell, M. A. A basal dromaeosaurid and size evolution preceding avian flight. *Science* **317**, 1378-1381 (2007).
65. Zanno, L. E., Gillette, D. D., Albright, L. B., Titus, A. L. A new North American therizinosaurid and the role of herbivory in 'predatory' dinosaur evolution. *Proc. R. Soc. B* **276**, 3505-3511 (2009).
66. Makovicky, P. J. A redescription of the *Montanoceratops cerorhynchus* holotype with a review of the referred material. *New Perspectives on Horned Dinosaurs* (eds Ryan, M. J., Chinnery-Allgeier, B. J. & Eberth, D. A.) 68-82 (Indiana University Press, Bloomington, IN, 2010).
67. Bakker, R. T., Sullivan, R. M., Porter, V., Larson, P. & Saulsbury, S. J. *Dracorex*

*hogwartsia*, n. gen., n. sp., a spiked, flat-headed pachycephalosaurid dinosaur from the Upper Cretaceous Hell Creek Formation of South Dakota. *New Mexico Museum of Natural History and Science Bulletin* **35**, 331-345 (2006).

68. Longrich, N. R. *Mojoceratops perifania*, a new chasmosaurine ceratopsid from the Late Campanian of western Canada. *J. Paleontol.* **84**, 681-694 (2010).

69. Farke, A. A. Anatomy and Taxonomic Status of the Chasmosaurine Ceratopsid *Nedoceratops hatcheri* from the Upper Cretaceous Lance Formation of Wyoming, U.S.A. *PLoS ONE* **6(1)**, e16196 (2011).

70. Maidment, S. C. R. & Barrett, P. M. A new specimen of *Chasmosaurus belli* (Ornithischia: Ceratopsidae), a revision of the genus, and the utility of postcrania in the taxonomy and systematics of ceratopsid dinosaurs. *Zootaxa* **2963**, 1-47 (2011).

71. Tanke, D. H. & Currie, P. J. A history of *Albertosaurus* discoveries in Alberta, Canada. *Can. J. Earth Sci.* **47**, 1197-1211 (2010).

72. Wilson, J. A., D'Emic, M. D., Curry Rogers, K. A., Mohabey, D. M. & Sen, S. Reassessment of the sauropod dinosaur *Jainosaurus* (= "*Antarctosaurus*") *septentrionalis* from the Upper Cretaceous of India. *Contributions from the Museum of Paleontology, University of Michigan* **32**, 17-40 (2009).
